# Supplementary material
Source: Springer Nature journal article supplement (https://www.springermedizin.de/resource/supplementary/12877_2013_970_MOESM1_ESM.pdf/9440808)
Supplement: MOESM1 [file 9440808]

Elderly residents of 32 nursing homes  
n=1187

Not included (n=436)

Away when study took place n=8  
Urine sample impossible to obtain  
due to severe incontinence or  
dementia n=291  
Urinary indwelling catheter n=96  
Ongoing dialysis n=1  
Unknown reason n=40

Eligible patients fulfilling inclusion criteria n=751

Excluded patients (n=96)

Refused participation n=96

Conclusive results (n=651)

Inconclusive results (n=4)

Data accidentally lost n=3  
Two urine cultures were accidentally  
taken showing different results n=1
